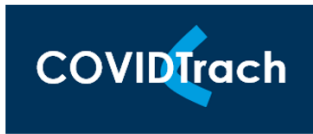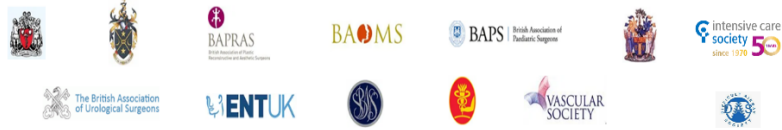

Supported By Federation of Surgical Specialty Associations, Difficult Airway Society & Intensive Care Society

## COVIDTrach; the outcomes of mechanically ventilated COVID-19 patients undergoing tracheostomy in the UK:

Interim Report 22<sup>nd</sup> May 2020

### **Acknowledgments**

#### **Lead authors**

Nick JI Hamilton<sup>1\*</sup>, Tony Jacob<sup>2,a</sup>, Anne GM Schilder<sup>3</sup>, Asit Arora<sup>4</sup>

- 1) NIHR Clinical Lecturer, University College London Hospitals NHS Foundation Trust
- 2) Consultant ENT & Head & Neck Surgeon, Lewisham & Greenwich NHS Trust
- 3) Director NIHR UCLH BRC Hearing Theme & evidENT, UCL Ear Institute
- 4) Consultant ENT & Head & Neck Surgeon, Guy's & St Thomas' NHS Foundation Trust

#### **Co-authors (listed alphabetically)**

Imran Ahmad<sup>5,b</sup>, Peter Andrews<sup>6</sup>, Martin Birchall<sup>6</sup>, Manish George<sup>7</sup>, John Goulder<sup>8</sup>, Frederick Green<sup>9</sup>, Emma Jackson<sup>10</sup>, Nirmal Kumar<sup>11,c</sup>, Shondipon Laha<sup>12,d</sup>, Brendan McGrath<sup>13</sup>, Guri Sandhu<sup>7</sup>, Clare Schilling<sup>6,e</sup>, Paul Stimpson<sup>6</sup>, Taran Tatla<sup>14</sup>, Neil Tolley<sup>7</sup>.

- 5) Guy's & St Thomas' NHS Foundation Trust
  - 6) University College London Hospitals NHS Foundation Trust
  - 7) Imperial College NHS Trust
  - 8) University College London Medical School
  - 9) Leeds General Infirmary
  - 10) Manchester Royal Infirmary
  - 11) Wrightington Wigan & Leigh NHS Foundation Trust
  - 12) Royal Preston Hospital
  - 13) University Hospital of South Manchester
  - 14) Northwick Park Hospital
- 
- a) Chair of the COVID-19 Tracheostomy Steering Committee
  - b) Difficult Airway Society representative
  - c) President of ENT UK
  - d) Intensive Care Society representative
  - e) British Association of Oral & Maxillofacial Surgeons representative

\*Corresponding author: [nick.hamilton@ucl.ac.uk](mailto:nick.hamilton@ucl.ac.uk)

Twitter: @CovidTrach

## **Key contributors to COVIDTrach (listed alphabetically)**

**Addenbrookes – Cambridge University Hospitals**, Rujuta Roplekar Bance, Irune Ekpemi, Ciara Walker, Katerina Karamali, Natalia Glibbery, Claudia Russell; **Arrowe Park Hospital – Wirral University Teaching Hospital**, Venkat Srinivasan, Mustaffa Junaid; **Ashford & St Peter's Hospitals**, Pardeep Gill; **Barts & The Royal London**, Khalid Ghufoor, Elinor Warner; **Belfast City Hospital**, Luke McCadden; **Bradford Teaching Hospitals (BRI)**, Eugene Omakobia; **Brighton & Sussex University Hospitals**, Cameron Davies Husband, Sridhayan Mahalingam, Nicky Seymour; **Chelsea & Westminster Hospital**, Jonathan Collier; **Countess of Chester Hospital**, Robert Temple, Rohan Pinto, Umesh Nagalotimath; **Coventry & Warwickshire Hospital**, Gary Walton, Prady Naredla; **Doncaster and Bassetlaw Teaching Hospitals (DRI)**, Nicola Stobbs; **Dorset County Hospital**, Susy Baker; **East Surrey Hospital - Surrey and Sussex Healthcare**, Karan Kapoor, Shahul Sirajuddin, Sean Fang, Fred van Damme, Owais Mattoo; **Eastbourne DGH - East Sussex Healthcare**, Rishi Vasanthan, Johannes Staufenberg; **Great Western Hospitals**, Jessica Lunn; **Guy's and St Thomas'**, Pavol Surda, Yakuba Karagama, Patrick Murphy, Eishaan Bhargava, Arun Takhar, Carol Xie, David Ranford, Jennifer Collins, Mairead Kelly, Misha Verkerk, Nikul Amin, Chrysostomos Tornari, David Pennell; **Imperial College Healthcare**, Chadwan Al-Yaghchi, Lulu Ritchie, Mustafa Jaafar, Nicholas Cereceda-Monteoliva, Rakesh Mistry, Jimmy Ng; **Isle of Wight**, Souvik Sanyal; **James Paget University Hospitals – Great Yarmouth**, Sheneen Meghji, Pieter Bothma; **John Radcliffe Hospital - Oxford University Hospitals**, Stuart Winter, Thomas Hunt; **Kings College Hospital**, Kathy Fan, Elizabeth Yeung, Jonas Osher, Robert Bentley; **King's Mill Hospital - Sherwood Forest Hospitals**, Saadatu Ladan, Paraskevi Tsirevelou, Pulak Paul, Valli Ratnam; **Kingston Hospital**, Michael Lee, David Allin, Ram Kumar; **Leicester Royal Infirmary**, Sophie Wilkinson; **Lister Hospital – East and North Hertfordshire NHS Trust**, Ananth Vijendren, Vignesh Venkatachalam; **Manchester Royal Infirmary**, Navin Mani, Haroon Saeed, Baskaran Ranganathan, Stefan linton; **Milton Keynes University Hospital**, Richard Stewart, Seneka Nakagawa, Richard Stewart; **Nevill Hall Hospital – Wales**, Edward Leakey; **New Cross Hospital – Wolverhampton**, Shayan Shahidi, Karan Jolly, Jonathan Fussey, Max Osborne; **Newcastle upon Tyne Hospitals**, Ben Cosway; **NHS Lanarkshire – Scotland**, Saleh Okhovat, Nick Calder; **North Cumbria Integrated Care**, Gemma Tattersall, Will Udall, Ben Hill; **Northwick Park Hospital**, Tiarnan Magos, Avgi Loizidou; **Nottingham University Hospitals**, Helen Turner, Yujay Ramakrishnan; **Pinderfields General Hospital**, Helen Buglass, Edward Tam, Usaama Sheikh; **Queen Elizabeth The Queen Mother Hospital – East Kent**, Ana Alegria, Sam Starnes; **Queens Hospital - Burton (UHDB)**, Adrian Thompson, Joshua Whittaker; **Queens Hospital – Romford**, Amro Hassan, Michaela Cameron; **Raigmore Hospital Inverness, NHS Highland**, Jonathan Whiteside; **Royal Berkshire NHS Foundation Trust**, Dilip Nair, Shivanthi Kandiah; **Royal Bolton Hospital**, Lucy Bates, Chloe Smart; **Royal Derby Hospital**, Owen Judd, Thomas Stubington, Timothy Davis; **Royal Hampshire County Hospital**, Andrea Burgess, Aikaterini Tsagkovits; **Royal Liverpool University Hospital**, Richard Siau; **Royal Papworth Hospital**, Kamen Valchanov; **Royal Preston Hospital**, Sharada Suresh; **St Georges Hospital – London**, Aleix Rovira, Deborah Dawson, Tiffany Munroe-Gray, Chrysostomos Tornari; **Stepping Hill Hospital – Stockport**, Nimisha Vallabh; **Tameside and Glossop Integrated Care**, Daniela Bondin, Daniel Thorley; **University College London Hospital**, Paul Stimpson, Priya Sethukumar; **University Hospital Lewisham**, Abigail Walker; **University Hospital Southampton**, Mike Celinski, Jennifer Smith, Jennifer Westwood; **University Hospitals Bristol and Weston NHS Foundation Trusts**, Emma Riley; **Walsall Manor Hospital**, Ahmad K. Abou-Foul, Attila Dezso; **West Middlesex University Hospital**, Agamemnon Pericleous; **West Suffolk Hospital**, Laura Leach; **Wexham Park Hospital**, James Bates; **Whipps Cross University Hospital**, Matt Lechner; **Wrexham Maelor Hospital**, Arvind Arya, Richard Brown; **Wythenshawe Hospital – University Hospitals South Manchester**, Rajesh Anmolsingh, Calum Smyth, Bakir Al-Dulaimy

## **Abstract**

COVIDTrach is a UK multidisciplinary collaborative project that aims to evaluate the outcomes of tracheostomy in COVID-19 patients. It also examines the implementation of national guidance in COVID-19 tracheostomies and the incidence of COVID-19 infections amongst those health care workers involved in the procedure.

An invitation to participate in an online survey tool (REDCap) was disseminated to all UK NHS departments involved in tracheostomy in mechanically ventilated COVID-19 patients via the Federation of Surgical Specialty Associations, its subsidiary organisations and the Intensive Care Society. To date 78 hospitals have submitted 564 COVID-19 tracheostomy cases.

Fifty-two percent (n=219/465) of patients who had undergone tracheostomy and were still alive had been successfully weaned from mechanical ventilation at the point of completing the survey. The all cause in-hospital mortality following tracheostomy was 12% (n=62/530), with 3% of these (n=2/62) due to tracheostomy related complications and the remaining deaths due to COVID-19 related complications. Amongst 400 cases submitting data two weeks after the tracheostomy, no instance of COVID-19 infection amongst operators was recorded. FFP3 masks or Powered Air Purifying Respirators were used by operators in 100% of tracheostomies and a face visor or hood with face shield was available in 99% of cases.

This interim report highlights early outcomes following tracheostomy in mechanically ventilated COVID-19 patients. Future reporting from COVIDTrach will include more detailed analysis at later timepoints using comparator groups in order to provide a more comprehensive assessment of tracheostomy in COVID-19.

## **Introduction**

At the time of writing, the UK has the fourth highest number of confirmed COVID-19 cases in the world with over 11,000 patients with COVID-19 having been admitted to intensive care since the start of the outbreak.<sup>1,2</sup> Standard UK intensive care practice is to consider tracheostomy after 7-10 days of invasive mechanical ventilation in order to reduce the duration of mechanical ventilation, shorten intensive care stay and minimise complications relating to the prolonged presence of an endotracheal tube.<sup>3-6</sup> Whether this practice is beneficial in mechanically ventilated patients with COVID-19 infection has not yet been extensively evaluated.

There are also unique considerations regarding health care professional (HCP) safety when performing tracheostomy in COVID-19 patients due to the potential of aerosol generation and transmission of the infection.<sup>7</sup> Various professional organisations have issued guidance regarding COVID-19 tracheostomy in terms of timing, environment, technique and level of personal protective equipment (PPE).<sup>8-10</sup> The ability of hospital departments to implement this guidance and the effects of these measures in terms of preventing COVID-19 illness amongst those performing tracheostomy is unknown.

COVIDTrach is a UK multidisciplinary collaborative project that aims to evaluate the effectiveness of tracheostomy in patients diagnosed with COVID-19 who are receiving invasive mechanical ventilation. In parallel, we will collect data on the procedure itself, audit the implementation of national guidance in COVID-19 tracheostomies and examine the risk in terms of COVID-19 infections amongst operators.

## **Reporting Process**

An invitation to participate in the COVIDTrach project was disseminated via the UK Federation of Surgical Specialty Associations (FSSA), its various member organisations and the Intensive Care Society (ICS) to reach all UK departments involved in tracheostomy in COVID-19 patients. Participating departments were sent a link to an online survey tool (REDCap) to collect anonymised and de-identified data on mechanically ventilated COVID-19 patients undergoing tracheostomy. Patient medical history along with early outcomes were labelled as priority data fields and have been the focus of data inputting for this interim report; (see Appendix 1 for questions and response rate). Results are given in brackets as a fraction of results received (n=results/number of results received).

## **Participants**

108 NHS departments across the UK registered to submit data to the COVIDTrach study with sites being led by a combination of ENT, Maxillofacial and Intensive Care Specialists. Between 6<sup>th</sup> April and 11<sup>th</sup> May 2020, data was received on 564 tracheostomies from 78 hospitals (Figure 1); 29 hospitals entered five or more cases which added up to 85% of all tracheostomies entered. These 29 were approached by email to establish the total number of tracheostomies in the above period; this was compared with the number of tracheostomies entered in COVIDTrach. For the 24 sites who replied, on average, 94% of all tracheostomies performed were recorded in the database.

### **Characteristics of COVID-19 patients undergoing tracheostomy**

The average age (data available in 563 cases) of mechanically ventilated COVID-19 patients undergoing tracheostomy was 57 years (Table 1). The majority of patients were male (n=405/563, 72%) and BMI ranged from 18.5 to <25 (22%), 25 to <30 (35%), 30 to <40 (35%) and >40 (8%) (data available in 426 cases). The number of days from admission to hospital to intubation ranged from 0 representing the day of admission to 33 days (median 1, IQR 0, 4). Forty percent of cases used non-invasive ventilation (NIV) prior to intubation (n=202/505).

The number of days from intubation (day 0) to tracheostomy ranged from 0-35 (median 16, IQR 13, 22) (Figure 2a, data available in 543 cases). The mean C-Reactive Protein (CRP) level on the day of tracheostomy was 123 (SD, 95) and there was a downtrend in 67% of reported cases (Figure 2b, n=366/547). A temperature of >37.5°C was recorded on the day of tracheostomy (28%), 1-2 days before (28%), 3-4 days before (18%) and 5 days before (26%) (data available in 489 cases). Inotropic support at the time of tracheostomy was reported in 41% of cases (n=220/538) although the type of inotrope was not established.

Figure 3 shows the oxygen requirements (FiO<sub>2</sub> %), and positive end expiratory pressure (PEEP cmH<sub>2</sub>O) before the procedure. The median FiO<sub>2</sub> was 40% (IQR 30, 45) (data available in 555 cases). Median PEEP was 8 (IQR 6, 10) (data available in 539 cases). The median PaO<sub>2</sub>/FiO<sub>2</sub> ratio on the day of tracheostomy was 199 (IQR 151, 244) (data available in 476 cases).

Ninety-three percent (n=521/558) of cases had a positive COVID-19 PCR test during their admission to hospital (Table 2). Of those that did not have a positive COVID-19 PCR test documented prior to tracheostomy, 14 were being treated for symptoms of COVID-19 but had no PCR test on record, 21 had only negative tests on record and for two, no reason was given. The number of tests performed prior to tracheostomy ranged from 1 to 12 (median 1, IQR 1,2). The COVID-19 test was positive in 86% (n=443/503) of patients prior to tracheostomy with the length of time from the last test to the day of surgery recorded as median 14 days (IQR 7,19). In those that did have more than one test, the second to last test was positive in 74% of cases (n=222/301).

### **Tracheostomy (the procedure itself)**

An anticipated “prolonged wean” was the most cited indication for tracheostomy (n=520/551), followed by failed extubation (n=64/551) (figure 4a). Other indications were the absence of a cuff leak (n=2/551), to free up ventilator capacity (n=2/551) and palliation (n=2/551). In 39 cases, both anticipated prolonged wean and absence of a cuff leak were cited.

An open method of tracheostomy was used in 58% of cases (n=323/560), a percutaneous method in 39% (n=217/560) and a hybrid method, that uses a combination of open and percutaneous techniques, was used in 3% (n=20/560) (figure 4b). Where a percutaneous method was used, a bronchoscope was used to identify the position for tracheostomy in 81% of cases (n=161/200) and an ultrasound used in 6% of cases (n=11/200). A range of surgical and Intensive care specialists performed the procedure with open cases being led exclusively by surgical specialists and percutaneous cases being predominantly led by intensive care specialists (76%, n=165/217).

Forty-three percent (n=226/527) of tracheostomies were performed by two consultant grade specialists and 35% (n=185/527) by a consultant grade lead and middle grade assistant. In 5% (n=24/527) of tracheostomies no assistant was used for the procedure. Fifty-five percent (n=293/530) of tracheostomies were performed in the operating theatre and 45% (n=237/530) in Intensive Care (n=237/530) (figure 4c). A negative pressure environment was used in 10% of cases (n=55/530).

A cuffed tube was used in virtually all cases (n=550/551) and a non-fenestrated tube was used in over 95% of cases (n=383/400). The size of tube varied from 6-9 with smaller tubes being used in female cases; size 6 in 0.4% (n=2/553), size 7 in 12% (n=68/553), size 7.5 in 4% (n=21/553), size 8 in 64% (n=354/553) and size 9 in 20% (n=108/553). The brand of tubes included Portex in 44% (n=244/553), TRACOE twist in 49% (273/553), Shiley in 4% (22/553) and an undisclosed brand in 3% (n=14/553). An adjustable flange tube was used in 10% of cases (n=52/515).

### **Early Outcomes following tracheostomy in COVID-19 patients**

The intraoperative complication rate was 10% (n=32/322) using the open method and 7% (n=16/216) using the percutaneous method. Across both open and percutaneous methods, the most common intraoperative complication was desaturation below 80% (n=17/558) and tear of the tracheostomy cuff (n=12/558) (figure 5). The post-operative complication rate was 20% (n=65/323) using the open method and 8% (n=17/217) using the percutaneous method. Bleeding was the most common postoperative complication (n=25/520). In addition to these complications, 36 instances of post-operative cuff leak were reported (28 following open method, 8 following percutaneous method) necessitating tube change in 21 cases.

Fifty-two percent (n=219/465) of COVID-19 patients who had undergone tracheostomy and were still alive had been weaned from mechanical ventilation at the point of completing the survey (Table 3). The number of days from tracheostomy to successful wean from mechanical ventilation in this group varied from one to 27 days (median 8; IQR 5, 12) (data available in 217 cases). Of those that had not yet been successfully weaned, the number of days from tracheostomy to entering data on weaning was less than 10 days in 44% (data available in 181 cases). At the point of survey, 38% (n=169/450) of patients who had undergone a tracheostomy had been discharged from intensive care.

The all-cause in-hospital mortality following tracheostomy in COVID-19 patients was 12% (n=62/530) with two deaths directly attributed to post-operative tracheostomy complications; a tracheostomy tube placed in a false passage and a displaced tracheostomy tube. The other 60 (97%) of these deaths were recorded as “COVID-19 related” (Table 3). The time from tracheostomy to COVID-19 related death ranged from one to 21 days (median 8, IQR 5, 12). There were no intraoperative deaths during tracheostomy.

### **Personal protective equipment and wellness of operators**

The question “Did any of the operators test positive for COVID-19 within two weeks of the procedure”, was answered by 71% (n=400/564) and all confirmed that no operators had become COVID-19 test positive within two weeks of the procedure. In all cases reported (n=545/545),

operators used either an FFP3 mask or Powered Air Purifying Respirator (PAPR) (Figure 6). Additional PPE used involved either a face visor or hood with face shield in 99% of cases (n=538/545), a disposable gown in 97% (n=527/545), double gloves in 90% (n=490/545) and disposable shoe covers in 25% (n=134/545) (Figure 6).

## **Discussion**

A priority of the COVIDTrach collaborative project is to assess the safety of colleagues involved in COVID-19 tracheostomies. To date, in 400 tracheostomies, no instances of COVID-19 infection have occurred amongst operators within two weeks of the procedure. Whilst this finding is reassuring, it should be viewed within the limits of collecting data by survey and does not account for the remaining cases that are yet to reach the two-week time point. The use of an FFP3 mask or PAPR was reported in 100% of cases, the use of adequate face protection in 99% and the use of a disposable gown in 97%. These figures indicate adequate provision of key PPE for operators during tracheostomy. An effort should be made to improve the use of double gloves and disposable shoe covers in all cases and will be the subject of further audit in later reports. The use of a two-person operator team in over 95% of cases is in keeping with national guidance and should continue to be encouraged as standard practice in all COVID-19 tracheostomies.

At the start of the pandemic, there were questions over the utility of tracheostomy as an intervention in COVID-19 patients.<sup>11-13</sup> At the time of writing, the all-cause in-hospital mortality rate in COVID-19 patients following tracheostomy was 12%. As many of the patients are yet to complete their critical care, these rates should be interpreted with caution and a rise in mortality is possible as patients succumb to their illness after a protracted course. Fifty-two percent of cases were successfully weaned from mechanical ventilation at the time of reporting. Whilst this may indicate tracheostomy is effective in enabling weaning in COVID-19 patients, there is significant heterogeneity in terms of co-morbidity, disease severity and prior medical intervention which needs to be explored further. The success in tracheostomy decannulation and eventual discharge from hospital will be reported in due course.

The timing and clinical criteria that ought to be met prior to tracheostomy in COVID-19 patients has been discussed at length in the literature.<sup>8,9,14</sup> Earlier guidance suggested tracheostomy at or after 14 days of intubation whilst more recent guidance suggests at or after 10 days of intubation.<sup>10</sup> So far, 82% of cases were performed at 10 days or more and 69% of cases 14 days or more and it is too early to comment on the effectiveness of implementing these criteria. Delaying tracheostomy may have the potential benefit of targeting the procedure to those most likely to survive. Viral load is also known to fall with time from the onset of symptoms and thus may reduce infectivity.<sup>15</sup> Conversely, delays may result in a missed therapeutic window and increase the duration of mechanical ventilation with associated complications. Further data collection will enable more detailed analysis on patient outcomes with reference to timing of the tracheostomy and the clinical indicators.

The mean age and gender of the patient population with COVID-19 undergoing tracheostomy is similar to national UK demographic data on patients critically ill with COVID-19 reported by ICNARC.<sup>1</sup> Detailed data collection on the patient's comorbid state was not within the remit of the early phase of data collection but will be a focus of later analysis as well as inclusion of ethnicity data.

The role of identifying PCR test status in COVID-19 patients ahead of tracheostomy is unclear. Guidelines from the British Laryngology Association and Canada recommend two negative tests before proceeding with tracheostomy.<sup>9,14</sup> Eighty-six percent of our cases tested positive on the last swab before tracheostomy and in the majority of cases, this was performed around the time of admission with no follow up test nearer the time of tracheostomy. The relevance of determining test status in the days prior to tracheostomy is uncertain. ICU patients can remain test positive for several weeks after the onset of symptoms,<sup>16,17</sup> and whether the detection of viral RNA by PCR predicts risk of infectivity to operators and other health care professionals is unclear. Delaying tracheostomy to achieve two negative tests is likely to prolong endotracheal ventilation and thus defer the potential benefits of tracheostomy whilst increasing the risk of complications relating to endotracheal intubation. The inflammatory marker CRP has been shown to correlate with COVID-19 disease severity,<sup>18,19</sup> and may be a better test to inform on the timing of tracheostomy. In this report 67% of tracheostomies were performed in patients with a downward trending CRP, although it is too early to assess whether this is predictive of improved patient outcomes.

An open tracheostomy method was used in 58% of cases although the predominance of surgical specialists reporting data in this initial report may account for this. We expect that in future reports, with more intensive care units joining the COVIDTrach collaborative and submitting data, the number of percutaneous tracheostomies will increase relative to the open surgical technique giving a more representative national picture. In the dataset so far, the complication rate was higher in surgical open tracheostomies compared to percutaneous cases. This is consistent with outcomes reported in the literature of non COVID-19 patients undergoing tracheostomy.<sup>20,21</sup> Rates of thrombosis are known to be high in severe COVID-19 illness necessitating the use of high dose anticoagulant medication.<sup>22</sup> This may explain the high postoperative bleeding rate following tracheostomy in this data set.

### **Future direction**

This report represents an interim analysis of data entered so far in the COVIDTrach multi-disciplinary collaborative project. Early reporting was felt necessary to share the availability of PPE, rate of infectivity amongst operators and early patient outcomes. We would like to thank all of the individuals contributing to this project for their hard work in returning data and we encourage new sites to sign up and participate.

Further reporting will include more complete datasets and focus on later outcomes following tracheostomy up to the point of discharge from hospital. As the project expands and further cases are received, more detailed analysis can occur to establish meaningful conclusions on the role and outcomes of tracheostomy in COVID-19 patients. We will also continue to audit the use of PPE and survey wellness amongst operators to ensure the safety of our colleagues.



## Data collection

Study data were collected and managed using REDCap electronic data capture tools hosted at University College London. REDCap (Research Electronic Data Capture) is a secure, web-based application designed to support data capture for research studies, providing: 1) an intuitive interface for validated data entry; 2) audit trails for tracking data manipulation and export procedures; 3) automated export procedures for seamless data downloads to common statistical packages; and 4) procedures for importing data from external sources.

## Funding

Nick Hamilton is an NIHR Clinical Lecturer and has been supported by a Royal College of Surgeons Pump Priming Grant and the Academy of Medical Sciences Starter Grant for Clinical Lecturers. Asit Arora has received funding from Smiths Medical and Medtronic as an unrestricted educational grant for the Global Tracheostomy Collaborative. Anne GM Schilder is an NIHR Senior Investigator and Director of the NIHR UCLH BRC Hearing Theme; the research of her UCL Ear Institute evidENT team is supported by the National Institute for Health Research (BRC, ARC, CRN, PGfAR, RfPB), Wellcome Trust, RCSEng, and EU Horizon2020.

## Disclosures

Asit Arora is a consultant for Cambridge Medical Robotics.

## References

1. Intensive Care National Audit & Research Centre. <https://www.icnarc.org/>. Accessed 11.04.20, 2020.
2. worlometer. COVID-19 Coronavirus Pandemic. <https://www.worldometers.info/coronavirus/>. Published 2020. Accessed 10.05.20, 2020.
3. Durbin CG, Jr., Perkins MP, Moores LK. Should tracheostomy be performed as early as 72 hours in patients requiring prolonged mechanical ventilation? *Respir Care*. 2010;55(1):76-87.
4. Groves DS, Durbin CG, Jr. Tracheostomy in the critically ill: indications, timing and techniques. *Curr Opin Crit Care*. 2007;13(1):90-97.
5. Jaeger JM, Littlewood KA, Durbin CG, Jr. The role of tracheostomy in weaning from mechanical ventilation. *Respir Care*. 2002;47(4):469-480; discussion 481-462.
6. Pierson DJ. Tracheostomy and weaning. *Respir Care*. 2005;50(4):526-533.
7. Tran K, Cimon K, Severn M, Pessoa-Silva CL, Conly J. Aerosol generating procedures and risk of transmission of acute respiratory infections to healthcare workers: a systematic review. *PLoS One*. 2012;7(4):e35797.
8. ENT.UK. COVID-19 Tracheostomy Guidance. <https://www.entuk.org/covid-19-tracheostomy-guidance-t-jacob-et-al>. Published 2020. Accessed 11.04.20, 2020.
9. Association BL. Tracheostomy Guideline COVID-19. <https://www.britishlaryngological.org/news/tracheostomy-guideline-covid-19>. Published 2020. Accessed 05.05.20, 2020.
10. McGrath BA BM, Warrillow SJ, Pandian V, Arora A, Cameron TS, Anon JM, Martinez GH, Truog RD, Block SD, Lui GCY, McDonald C, Rassekh CH, Atkins J, Qiang L, Vergez S, Dulguerov P, Zenk J, Antonelli M, Pelosi P, Walsh BK, Ward E, Shang Y, Gasparini S, Donati A, Singer M, Openshaw PJM, Tolley N, Markel H, Feller-Kopman DJ. Tracheostomy in the COVID-19 era: global and multidisciplinary guidance. *Lancet Resp Med*. 2020; doi.org/10.1016/S2213-2600(20)30230230-7.

11. Project NTS. NTSP considerations for tracheostomy in the COVID-19 outbreak. [http://www.tracheostomy.org.uk/storage/files/NTSP%20COVID\\_19%20tracheostomy%20guidance%2031\\_3\\_20.pdf](http://www.tracheostomy.org.uk/storage/files/NTSP%20COVID_19%20tracheostomy%20guidance%2031_3_20.pdf). Published 2020. Accessed 07.05.20, 2020.
12. NP Parker BS, MA Fritz, SK Rapoport, S Schild, KW Altman, AL Merati, MA Kuhn. Tracheotomy Recommendations During the COVID-19 Pandemic. <https://www.entnet.org/content/tracheotomy-recommendations-during-covid-19-pandemic>. Published 2020. Accessed 12.05.2020, 2020.
13. Vukkadala N, Qian ZJ, Holsinger FC, Patel ZM, Rosenthal E. COVID-19 and the Otolaryngologist: Preliminary Evidence-Based Review. *Laryngoscope*. 2020.
14. Sommer DD, Engels PT, Weitzel EK, et al. Recommendations from the CSO-HNS taskforce on performance of tracheotomy during the COVID-19 pandemic. *J Otolaryngol Head Neck Surg*. 2020;49(1):23.
15. Zou L, Ruan F, Huang M, et al. SARS-CoV-2 Viral Load in Upper Respiratory Specimens of Infected Patients. *N Engl J Med*. 2020;382(12):1177-1179.
16. Zhao J, Yuan Q, Wang H, et al. Antibody responses to SARS-CoV-2 in patients of novel coronavirus disease 2019. *Clin Infect Dis*. 2020.
17. Zhou F, Yu T, Du R, et al. Clinical course and risk factors for mortality of adult inpatients with COVID-19 in Wuhan, China: a retrospective cohort study. *Lancet*. 2020;395(10229):1054-1062.
18. Tan C, Huang Y, Shi F, et al. C-reactive protein correlates with computed tomographic findings and predicts severe COVID-19 early. *J Med Virol*. 2020.
19. Liu F, Li L, Xu M, et al. Prognostic value of interleukin-6, C-reactive protein, and procalcitonin in patients with COVID-19. *J Clin Virol*. 2020;127:104370.
20. Freeman BD, Isabella K, Lin N, Buchman TG. A meta-analysis of prospective trials comparing percutaneous and surgical tracheostomy in critically ill patients. *Chest*. 2000;118(5):1412-1418.
21. Klotz R, Probst P, Deininger M, et al. Percutaneous versus surgical strategy for tracheostomy: a systematic review and meta-analysis of perioperative and postoperative complications. *Langenbecks Arch Surg*. 2018;403(2):137-149.
22. Kollias A, Kyriakoulis KG, Dimakakos E, Poulakou G, Stergiou GS, Syrigos K. Thromboembolic risk and anticoagulant therapy in COVID-19 patients: emerging evidence and call for action. *Br J Haematol*. 2020.

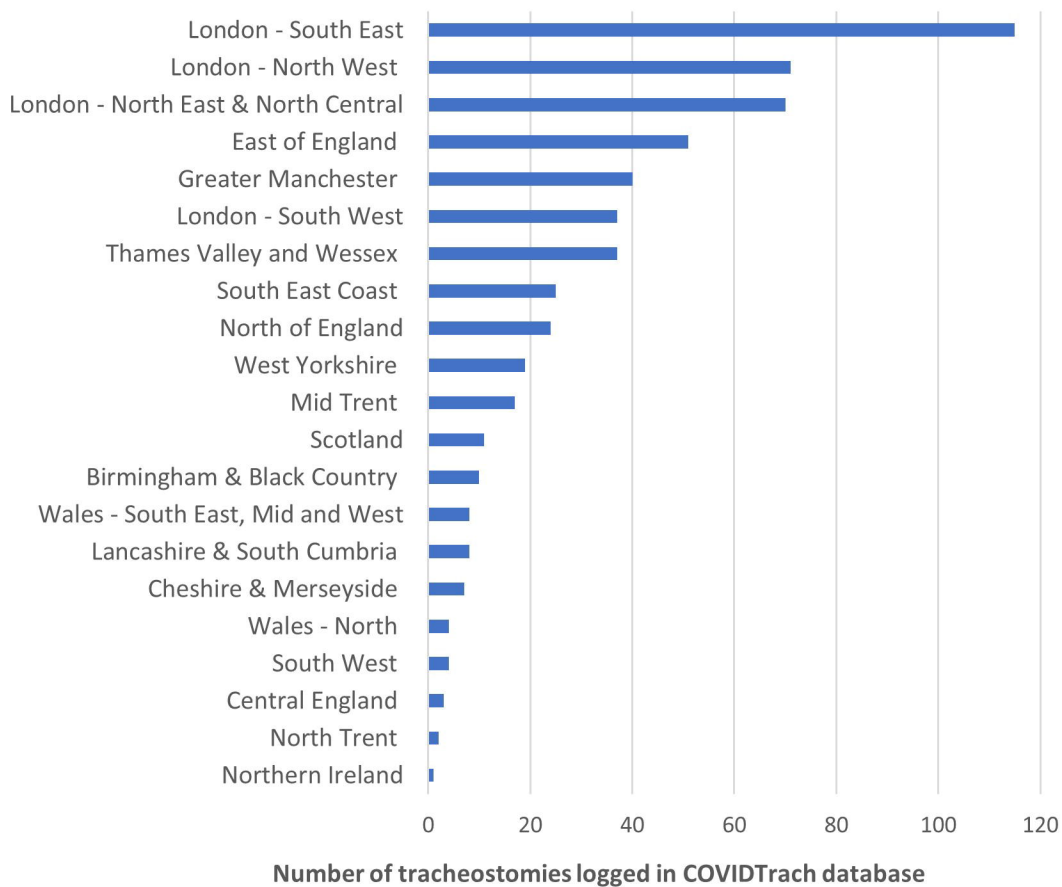

**Figure 1.** Number of tracheostomies in COVID-19 patients logged in the COVIDTrach database by UK region from 6<sup>th</sup> April to 11<sup>th</sup> May 2020 [N=564]

| Demographics                                                         | COVID-19 patients<br>undergoing tracheostomy |
|----------------------------------------------------------------------|----------------------------------------------|
| Age (years) [N=563]                                                  |                                              |
| Mean (SD)                                                            | 57 (11)                                      |
| Sex n (%) [N=563]                                                    |                                              |
| Male                                                                 | 405 (72)                                     |
| Female                                                               | 158 (28)                                     |
| Body mass index, [N=426]                                             |                                              |
| 18.5-<25                                                             | 91 (22)                                      |
| 25-<30                                                               | 150 (35)                                     |
| 30-<40                                                               | 151 (35)                                     |
| >40                                                                  | 34 (8)                                       |
| Medical History                                                      |                                              |
| Time from admission to hospital to intubation n (%), [N=521]         |                                              |
| on the day of admission                                              | 171 (33)                                     |
| 1-2 days after admission                                             | 141 (27)                                     |
| 3-5 days after admission                                             | 109 (21)                                     |
| > 5 days after admission                                             | 100 (19)                                     |
| Use of NIV* between admission to hospital and intubation (%) [N=505] | 202 (40)                                     |
| Key comorbidities n (%) [N=520]                                      |                                              |
| None                                                                 | 146 (28)                                     |
| Asthma                                                               | 80 (15)                                      |
| Cancer                                                               | 17 (3)                                       |
| Diabetes                                                             | 179 (34)                                     |
| Hypertension                                                         | 236 (45)                                     |
| *NIV = non invasive ventilation                                      |                                              |

**Table 1:** Demographics and disease specific characteristics of COVID-19 patients undergoing tracheostomy.

a.

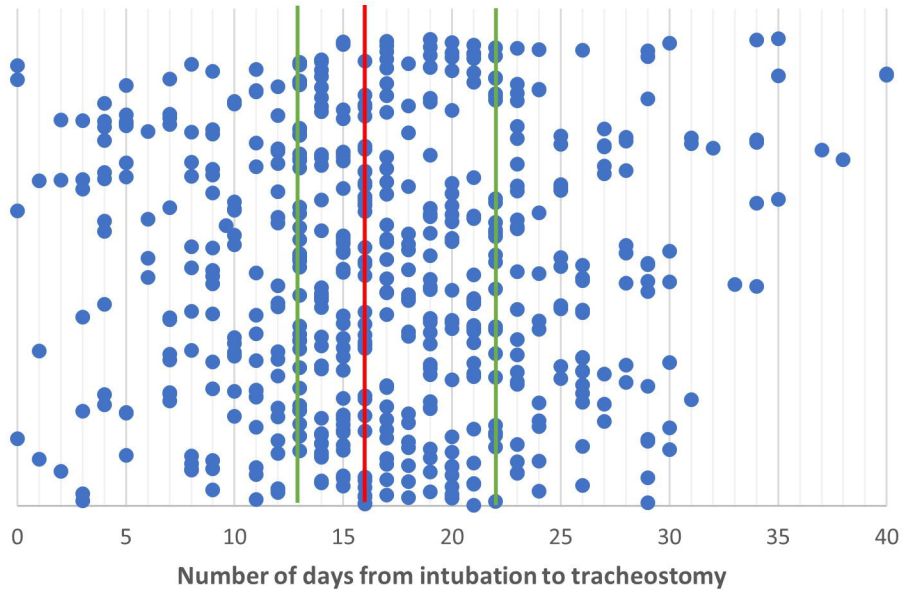

b.

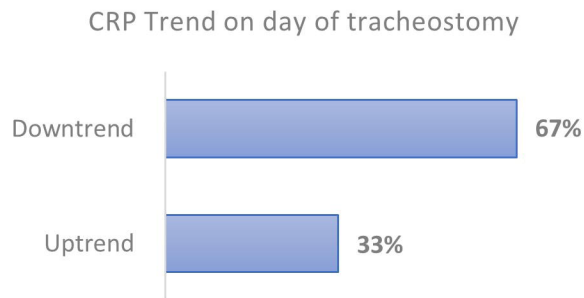

**Figure 2 (a)** The number of days of invasive mechanical ventilation prior to the day of tracheostomy. Each dot represents one case. The red line indicates the median and the green lines the first and third quartile [N=543] **(b)** The trend of C Reactive Protein on the day of tracheostomy [N=547]

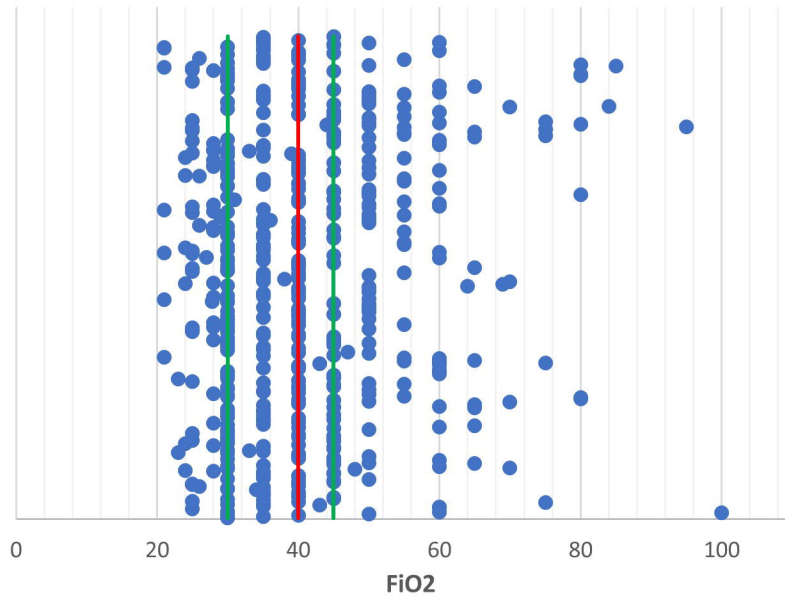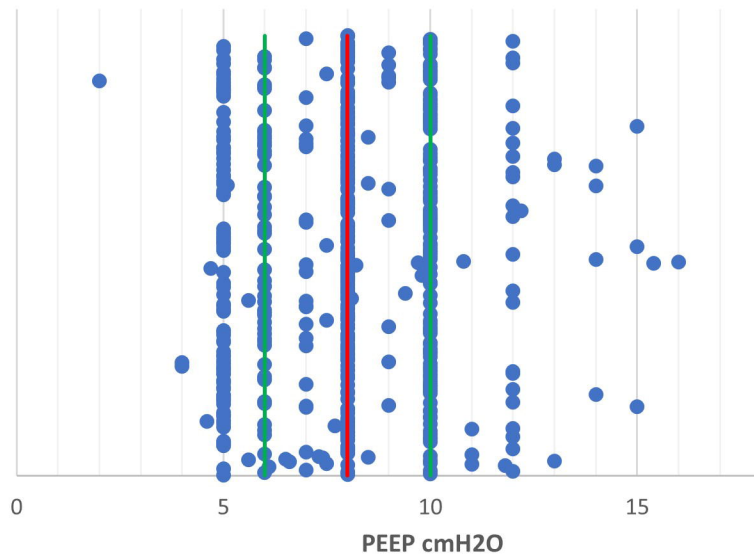

**Figure 3.** Oxygen requirements (FiO2%, N=544) and Positive End Expiratory Pressure (PEEP cmH2O, N=539) on the day of tracheostomy. Each dot represents an individual case. The red lines represent the median value and the green lines the 1<sup>st</sup> and 3<sup>rd</sup> quartile.

### COVID-19 PCR Test in patients undergoing tracheostomy

|                                                                  |            |
|------------------------------------------------------------------|------------|
| Test positive during admission to hospital<br>(%) N=558          |            |
| Positive                                                         | 521 (93)   |
| Negative                                                         | 37 (7)     |
| Total number of tests during admission to<br>hospital, N=481     |            |
| Median (IQR)                                                     | 1 (1, 2)   |
| Outcome of last test before tracheostomy<br>(%), N=503           |            |
| Positive                                                         | 433 (86)   |
| Negative                                                         | 70 (14)    |
| Outcome of second to last test before<br>tracheostomy (%), N=301 |            |
| Positive                                                         | 222 (74)   |
| Negative                                                         | 79 (26)    |
| Number of days from last test to<br>tracheostomy, N=499          |            |
| Median (IQR)                                                     | 14 (7, 19) |

**Table 2.** COVID-19 PCR test of patient prior to tracheostomy with number of swabs performed and outcome of swabs prior to tracheostomy.

a.

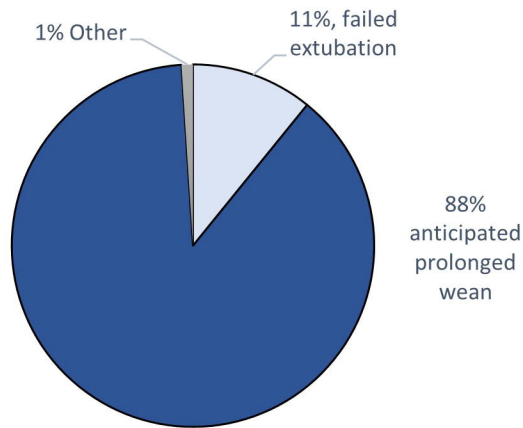

b.

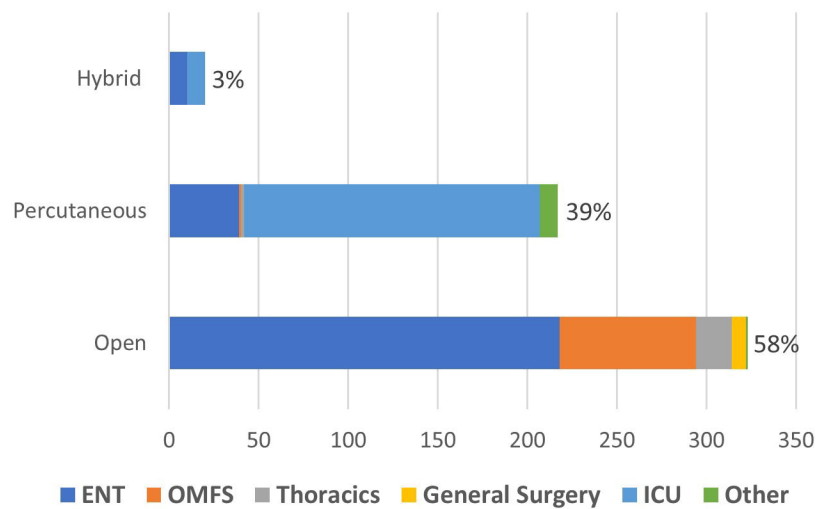

c.

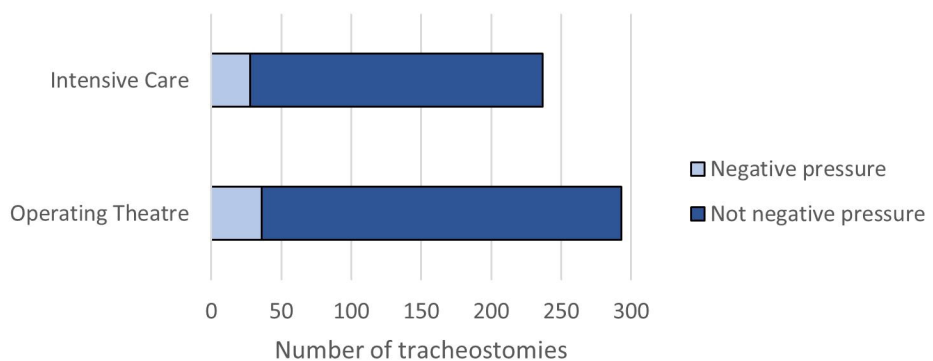

**Figure 4 (a)** Indication for tracheostomy in COVID-19 patients [N=551] **(b)** Method of tracheostomy and specialty of lead operator. Open refers to surgical tracheostomy, hybrid refers to a tracheostomy that uses a combination or surgical and percutaneous techniques [N=560] **(c)** Location of tracheostomy and use of negative pressure environment [N=530]



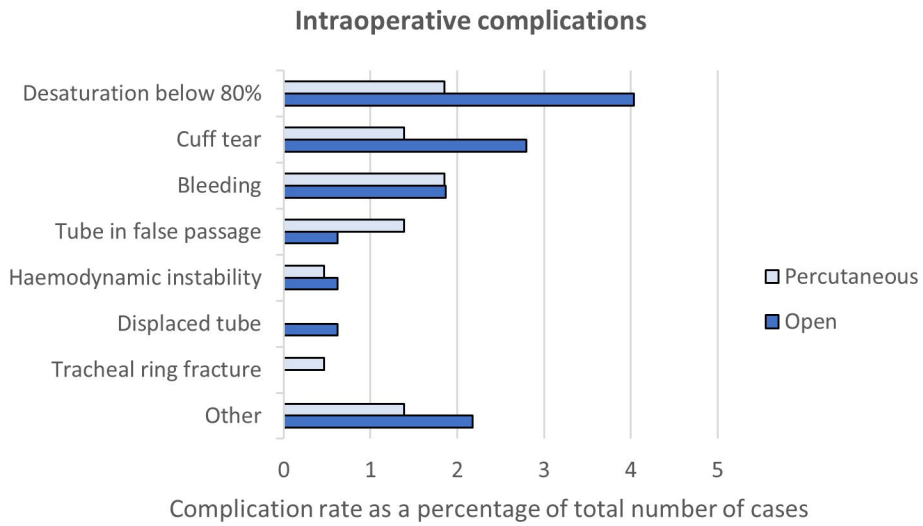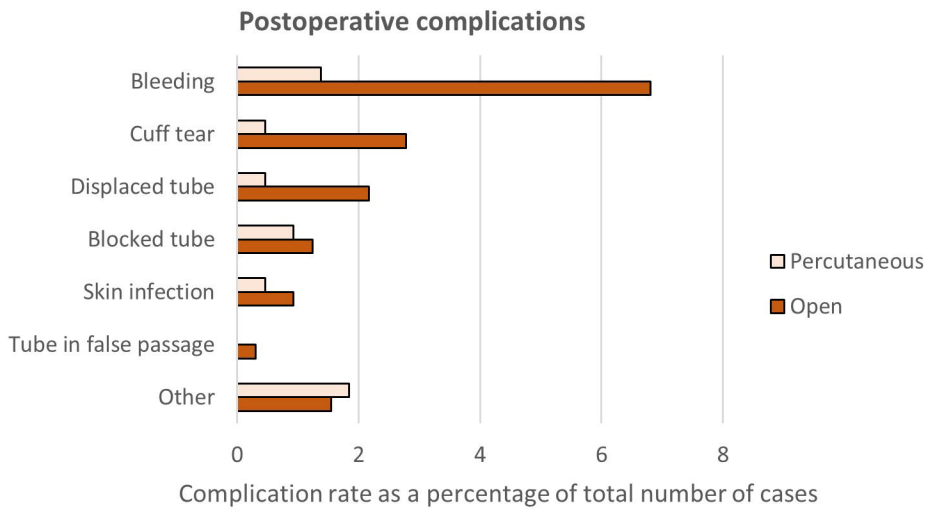

**Figure 5.** Intraoperative complications [N=558] and postoperative complications [N=520] divided by open surgical and percutaneous methods of tracheostomy in COVID-19 patients.

### Outcomes following tracheostomy in COVID-19 patients

|                                                                               |           |
|-------------------------------------------------------------------------------|-----------|
| All cause mortality following tracheostomy in COVID-19 patients n (%) [N=530] |           |
| Died following tracheostomy                                                   | 62 (12)   |
| Still alive at the point of survey                                            | 468 (88)  |
| Cause of death following tracheostomy n (%) [N=62]                            |           |
| COVID-19 related                                                              | 60 (97)   |
| Tracheostomy related                                                          | 2 (3)     |
| Duration (days) from tracheostomy to death [N=62]                             |           |
| Median (IQR)                                                                  | 8 (5, 12) |
| Weaning from mechanical ventilation n (%) [N=465]                             |           |
| Successfully weaned from mechanical ventilation                               | 244 (52)  |
| Still ventilated at the time of completing the survey                         | 221 (48)  |
| Time (days) from tracheostomy to successful wean [N=217]                      |           |
| 1-3 days                                                                      | 28 (13)   |
| 4-6 days                                                                      | 50 (23)   |
| 7-9 days                                                                      | 48 (22)   |
| 10-12 days                                                                    | 40 (18)   |
| 13-15 days                                                                    | 26 (12)   |
| >15 days                                                                      | 25 (12)   |
| Discharge from ICU n (%), [N=450]                                             |           |
| Discharged from ICU at the point of survey                                    | 169 (38)  |
| Still in ICU at the point of survey                                           | 281 (62)  |

**Table 3.** Outcomes following tracheostomy in COVID-19 patients

a.

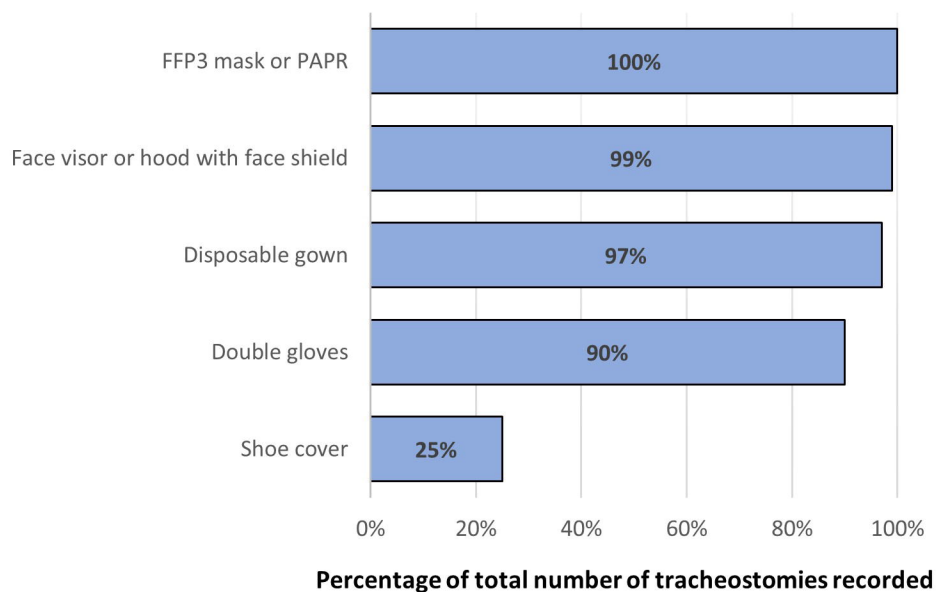

b.

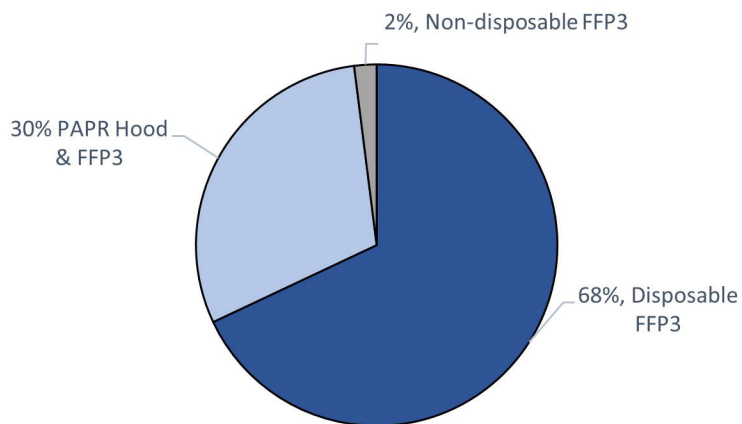

**Figure 6 (a)** The percentage of personal protective equipment (PPE) used as a percentage of the total number of tracheostomies recorded [N=545] **(b)** The type of face mask used during the tracheostomy [N=545]

| Variable                              | N missing (%) |
|---------------------------------------|---------------|
| <b>Demographic</b>                    |               |
| Age                                   | 1 (0.2)       |
| Gender                                | 1 (0.2)       |
| BMI                                   | 138 (24)      |
| <b>Medical History</b>                |               |
| Admission to intubation (days)        | 43 (7.6)      |
| Use of NIV                            | 59 (10)       |
| Co-morbidities                        | 44 (7.8)      |
| Intubation to tracheostomy (days)     | 21 (3.7)      |
| CRP before tracheostomy               | 17 (3)        |
| Temperature before tracheostomy       | 75 (13.2)     |
| FiO2                                  | 20 (3.5)      |
| PEEP                                  | 25 (4.4)      |
| <b>COVID status</b>                   |               |
| Test positivity                       | 6 (1)         |
| Number of tests                       | 40 (7.7)      |
| Outcome of last test                  | 18 (3.5)      |
| Time from test to tracheostomy (days) | 22 (4.2)      |
| <b>Tracheostomy details</b>           |               |
| Indication for tracheostomy           | 13 (2.3)      |
| Method of tracheostomy                | 4 (0.7)       |
| Location of tracheostomy              | 34 (6)        |
| <b>Outcomes</b>                       |               |
| Intraoperative complications          | 6 (1)         |
| Postoperative complications           | 44 (7.8)      |
| Mortality                             | 34 (6)        |
| Cause of death                        | 0             |
| Time to death (days)                  | 0             |
| Wean from ventilator                  | 37 (7.4)      |
| Time from tracheostomy to wean        | 27 (11)       |
| Discharge from ICU                    | 52 (10.4)     |
| Use of PPE                            | 19 (3.4)      |

**Appendix 1.** Summary of data completeness for each key variable
